# Supplementary material
Source: HighWire-hosted journal article supplement (https://hw-f5-jim.highwire.org/content/70/5/1320)

**Supplementary Figure 1.** Accumulated number of total funding's by year from 1990 to 2020.

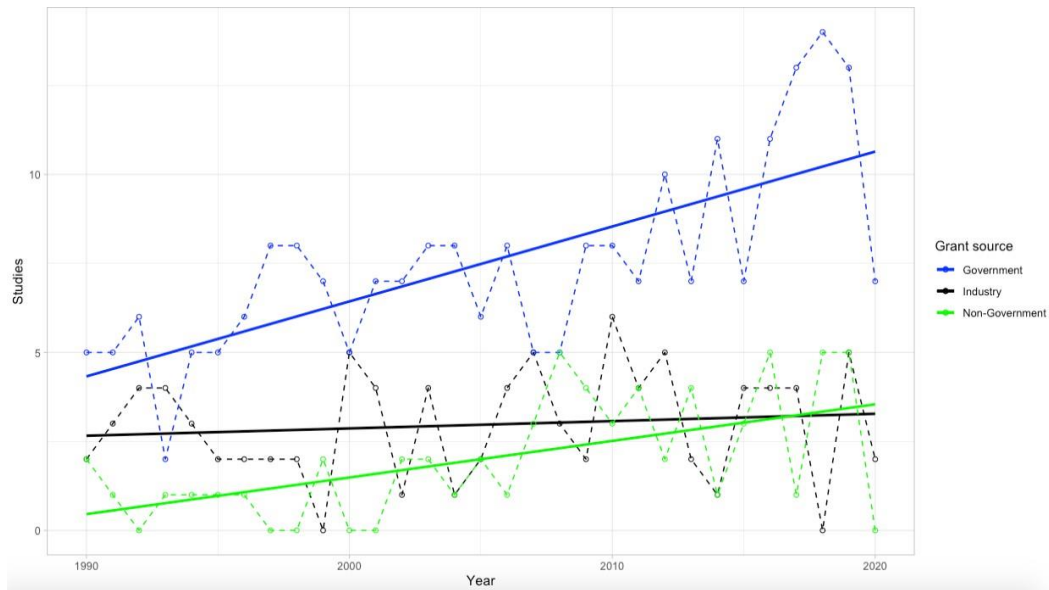

**Supplementary Figure 2.** Accumulated number of observational funding's by year from 1990 to 2020.

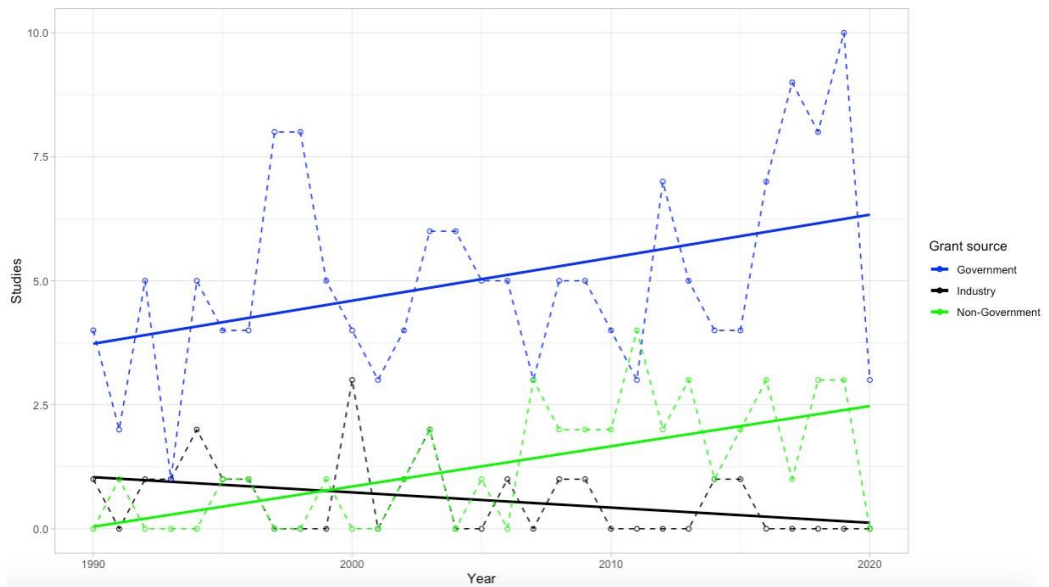

**Supplementary Figure 3.** Percentage of total experimental funding's by year from 1990 to 2020.

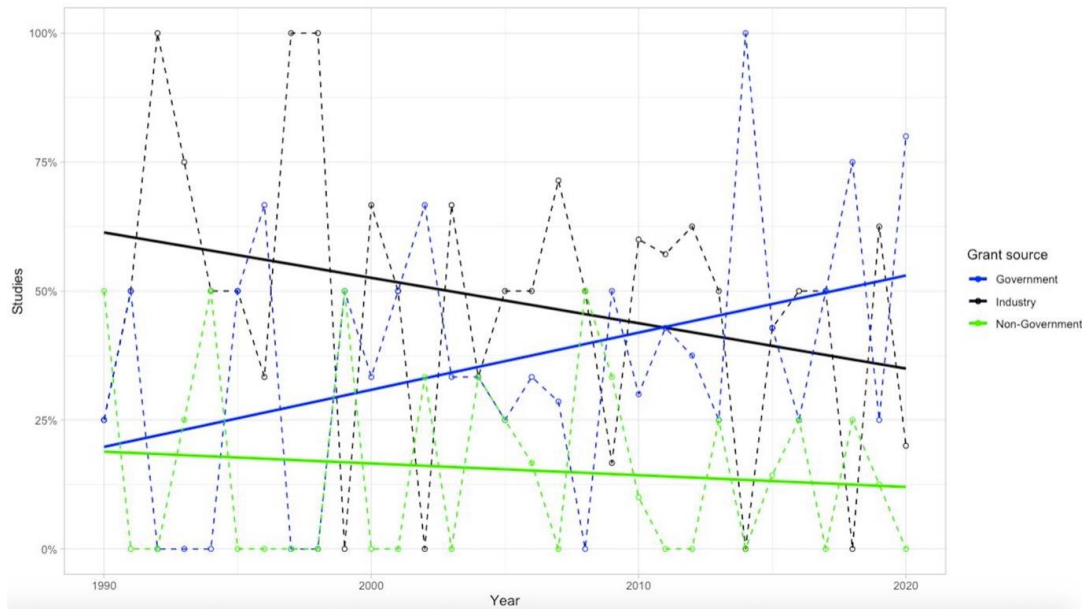

**Supplementary Figure 4.** Accumulated number of experimental funding's by year from 1990 to 2020.

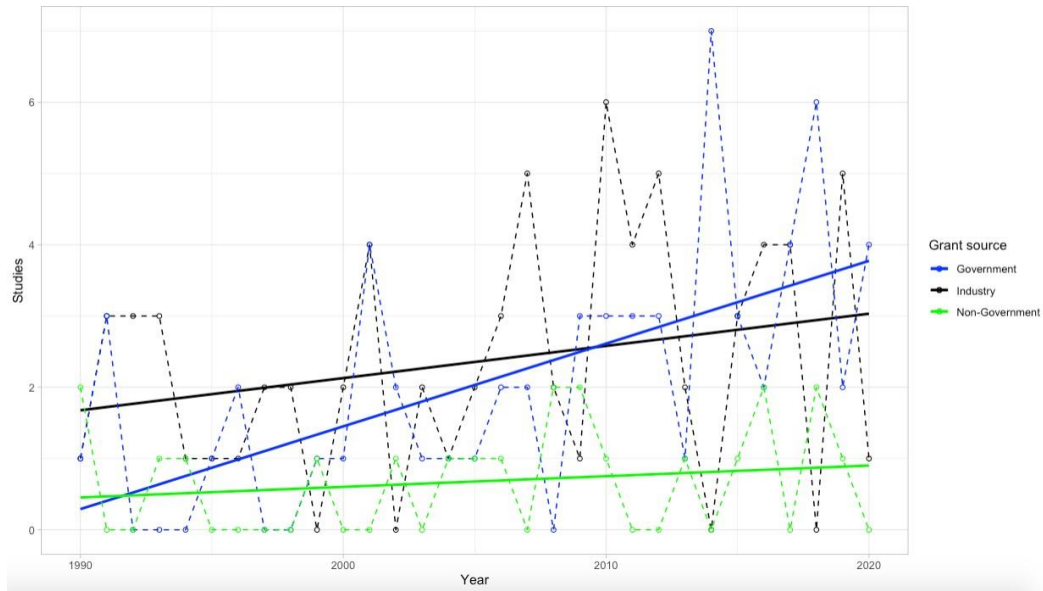

Supplement: inline-supplementary-material-1 [file inline-supplementary-material-1.pdf]
